# Supplementary material for: The role of fast and slow processes in the formation of structure and properties of thermoplastic polyurethanes
Source: Royal Society of Chemistry journal article supplement (doi:10.1039/c6cp05895g), 2016-01-01
Supplement: c6cp05895g1.pdf [file c6cp05895g1.pdf]

Electronic Supplementary Information:

Received 00th January 20xx,  
Accepted 00th January 20xx

DOI: 10.1039/x0xx00000x

www.rsc.org/

The role of fast and slow processes in the formation of structure and properties of thermoplastic polyurethanes

D. V. Anokhin,<sup>\*a,b</sup> M. A. Gorbunova,<sup>\*a</sup> Ya. I. Estrin,<sup>a</sup> V. V. Komratova<sup>a</sup> and E. R. Badamshina<sup>a</sup>

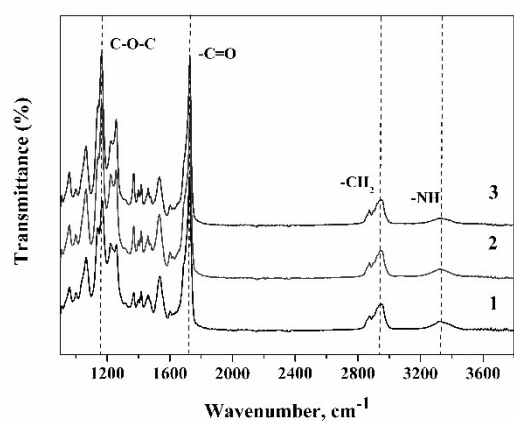

Fig. S1. FT-IR spectra of the non-oriented TPUU films after 2 weeks (curve 1), 30 month (curve 2) and 60 month (curve 3) of storage.

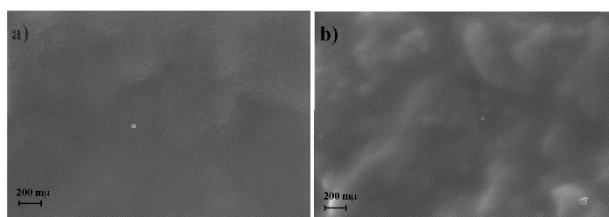

Fig. S2. SEM images of the non-oriented TPUU films after 2 weeks (a) and 60 month (b) of storage.
